# Supplementary material
Source: PubMed Central journal article supplement (PMC3533376)
Supplement: NIHMS342322-supplement-Supplement.pdf [file NIHMS342322-supplement-Supplement.pdf]

# Supplemental Information

C.J.Oates and S.Mukherjee

November 15, 2011

## Abstract

This supplement accompanies Oates, C.J., Mukherjee, S. (2011) Network Inference and Biological Dynamics.

This document is constructed as follows: Section 1 recalls the dynamical systems and parameters used to simulate single cell trajectories. Section 2 provides derivations relating to the variance function. Section 3 contains additional Figures and results.

## 1 Dynamical Systems

### 1.1 Model 1: Cantone *et al.*

Ref: Cantone, I., Marucci, L., Iorio, F., *et al.* (2009) A yeast synthetic network for in vivo assessment of reverse-engineering and modeling approaches, *Cell*, **137**(1), 172-81.

$$x_1 = [Cbf1], x_2 = [Gal4], x_3 = [Swi5], x_4 = [Gal80], x_5 = [Ash1]$$

$$\begin{aligned}\frac{dx_1}{dt} &= \alpha_1 + v_1 \left( \frac{x_3^{h_1}(t - \tau)}{(k_1^{h_1} + x_3^{h_1}(t - \tau)) \left(1 + \frac{x_2^{h_2}}{k_2^{h_2}}\right)} \right) - d_1 x_1 \\ \frac{dx_2}{dt} &= \alpha_2 + v_2 \left( \frac{x_1^{h_3}}{k_3^{h_3} + x_1^{h_3}} \right) - d_2 x_2 \\ \frac{dx_3}{dt} &= \alpha_3 + v_3 \left( \frac{x_2^{h_4}}{k_4^{h_4} + x_2^{h_4} \left(1 + \frac{x_4^{h_4}}{\gamma^4}\right)} \right) - d_3 x_3 \\ \frac{dx_4}{dt} &= \alpha_4 + v_4 \left( \frac{x_3^{h_5}}{k_5^{h_5} + x_3^{h_5}} \right) - d_4 x_4 \\ \frac{dx_5}{dt} &= \alpha_5 + v_5 \left( \frac{x_3^{h_6}}{k_6^{h_6} + x_3^{h_6}} \right) - d_5 x_5\end{aligned}$$

Parameter values were taken from the “switch-on” experimental conditions.

| Parameter  | Description                                      | Value used for simulation          |
|------------|--------------------------------------------------|------------------------------------|
| $k_1$      | M. M. const. (SWI5 $\rightarrow$ HO pr)          | 1 [a.u.]                           |
| $k_2$      | M. M. const. (ASH1 $\rightarrow$ HO pr)          | 0.0356 [a.u.]                      |
| $k_3$      | M. M. const. (CBF1 $\rightarrow$ MET16 pr)       | 0.0372 [a.u.]                      |
| $k_4$      | M. M. const. (GAL4 $\rightarrow$ GAL10 pr)       | 0.01 [a.u.]                        |
| $k_5$      | M. M. const.(SWI5 $\rightarrow$ ASH1 pr (GAL80)) | 1.814 [a.u.]                       |
| $k_6$      | M. M. const. (SWI5 $\rightarrow$ ASH1 pr (ASH1)) | 1.814 [a.u.]                       |
| $\alpha_1$ | Basal act. of the HO pr                          | 0 [a.u. min <sup>-1</sup> ]        |
| $\alpha_2$ | Basal act. of the MET16 pr                       | 0.000149 [a.u. min <sup>-1</sup> ] |
| $\alpha_3$ | Basal act. of the GAL10 pr                       | 0.003 [a.u. min <sup>-1</sup> ]    |
| $\alpha_4$ | Basal act. of the ASH1 pr (GAL80)                | 0.00074 [a.u. min <sup>-1</sup> ]  |
| $\alpha_5$ | Basal act. of the ASH1 pr (ASH1)                 | 0.00061 [a.u. min <sup>-1</sup> ]  |
| $v_1$      | Max. HO pr trans.                                | 0.04 [a.u. min <sup>-1</sup> ]     |
| $v_2$      | Max. MET16 pr trans.                             | 0.000882 [a.u. min <sup>-1</sup> ] |
| $v_3$      | Max. GAL10 pr trans.                             | 0.0201 [a.u. min <sup>-1</sup> ]   |
| $v_4$      | Max. ASH1 pr (GAL80) trans.                      | 0.0147 [a.u. min <sup>-1</sup> ]   |
| $v_5$      | Max. ASH1 pr (ASH1) trans.                       | 0.0182 [a.u. min <sup>-1</sup> ]   |
| $d_1$      | Deg. rate of CBF1                                | 0.0222 [min <sup>-1</sup> ]        |
| $d_2$      | Deg. rate of GAL4                                | 0.0478 [min <sup>-1</sup> ]        |
| $d_3$      | Deg. rate of SWI5                                | 0.4217 [min <sup>-1</sup> ]        |
| $d_4$      | Deg. rate of GAL80                               | 0.0980 [min <sup>-1</sup> ]        |
| $d_5$      | Deg. rate of ASH1                                | 0.05 [min <sup>-1</sup> ]          |
| $\gamma$   | Affinity in the law of SWI5                      | 0.6 [a.u.]                         |
| $h_1$      | Hill coef. (SWI5 $\rightarrow$ HO pr)            | 1                                  |
| $h_2$      | Hill coef. (ASH1 $\rightarrow$ HO pr)            | 1                                  |
| $h_3$      | Hill coef. (CBF1 $\rightarrow$ MET16 pr)         | 1                                  |
| $h_4$      | Hill coef. (GAL4 $\rightarrow$ GAL10 pr)         | 4                                  |
| $h_5$      | Hill coef. (SWI5 $\rightarrow$ ASH1 pr (GAL80))  | 1                                  |
| $h_6$      | Hill coef. (SWI5 $\rightarrow$ ASH1 pr (ASH1))   | 1                                  |
| $\tau$     | Time delay                                       | 100 [min]                          |

## 1.2 Model 2: Swat

Ref: Swat, M., Kel, A., Herzog, H. (2004) Bifurcation analysis of the regulatory modules of the mammalian G1/S transition, *Bioinformatics*, **20**(10), 1506-11.

$$x_1 = [pRB], x_2 = [E2F1], x_3 = [CycD_i], x_4 = [CycD_a], x_5 = [AP - 1]$$

$$x_6 = [pRB_p], x_7 = [pRB_{pp}], x_8 = [CycE_i], x_9 = [CycE_a]$$

$$\begin{aligned} \frac{dx_1}{dt} &= k_1 \frac{x_2}{k_{m1} + x_2} \frac{J_{11}}{J_{11} + x_1} \frac{J_{61}}{J_{61} + x_6} - k_{16}x_1x_4 + k_{61}x_6 - \phi_1x_1 \\ \frac{dx_2}{dt} &= k_p + k_2 \frac{a^2 + x_2^2}{k_{m2}^2 + x_2^2} \frac{J_{12}}{J_{12} + x_1} \frac{J_{62}}{J_{62} + x_6} - \phi_2x_2 \\ \frac{dx_3}{dt} &= k_3x_5 + k_{23}x_2 \frac{J_{13}}{J_{13} + x_1} \frac{J_{63}}{J_{63} + x_6} + k_{43}x_4 - k_{34}x_3 \frac{x_4}{k_{m4} + x_4} - \phi_3x_3 \\ \frac{dx_4}{dt} &= k_{34}x_3 \frac{x_4}{k_{m4} + x_4} - k_{43}x_4 - \phi_4x_4 \\ \frac{dx_5}{dt} &= F_m + k_{25}x_2 \frac{J_{15}}{J_{15} + x_1} \frac{J_{65}}{J_{65} + x_6} - \phi_5x_5 \\ \frac{dx_6}{dt} &= k_{16}x_1x_4 - k_{61}x_6 - k_{67}x_6x_9 + k_{76}x_7 - \phi_6x_6 \\ \frac{dx_7}{dt} &= k_{67}x_6x_9 - k_{76}x_7 - \phi_7x_7 \\ \frac{dx_8}{dt} &= k_{28}x_2 \frac{J_{18}}{J_{18} + x_6} \frac{J_{68}}{J_{68} + x_7} + k_{98}x_9 - k_{89}x_8 \frac{x_9}{k_{m9} + x_9} - \phi_8x_8 \\ \frac{dx_9}{dt} &= k_{89}x_8 \frac{x_9}{k_{m9} + x_9} - k_{98}x_9 - \phi_9x_9 \end{aligned}$$

| Parameter | Value used for simulation |
|-----------|---------------------------|
| $k_1$     | 1                         |
| $k_2$     | 1.6                       |
| $k_3$     | 0.05                      |
| $k_{16}$  | 0.4                       |
| $k_{34}$  | 0.04                      |
| $k_{43}$  | 0.01                      |
| $k_{61}$  | 0.3                       |
| $k_{67}$  | 0.7                       |
| $k_{76}$  | 0.1                       |
| $k_{23}$  | 0.3                       |
| $k_{25}$  | 0.9                       |
| $k_{28}$  | 0.06                      |
| $k_{89}$  | 0.07                      |
| $k_{98}$  | 0.01                      |
| $a$       | 0.04                      |
| $J_{11}$  | 0.5                       |
| $J_{12}$  | 5                         |
| $J_{15}$  | 0.001                     |
| $J_{18}$  | 0.6                       |
| $J_{61}$  | 5                         |
| $J_{62}$  | 8                         |
| $J_{65}$  | 6                         |
| $J_{68}$  | 7                         |
| $J_{13}$  | 0.002                     |
| $J_{63}$  | 2                         |
| $k_{m1}$  | 0.5                       |
| $k_{m2}$  | 4                         |
| $k_{m4}$  | 0.3                       |
| $k_{m9}$  | 0.005                     |
| $k_p$     | 0.05                      |
| $\phi_1$  | 0.005                     |
| $\phi_2$  | 0.1                       |
| $\phi_3$  | 0.023                     |
| $\phi_4$  | 0.03                      |
| $\phi_5$  | 0.01                      |
| $\phi_6$  | 0.06                      |
| $\phi_7$  | 0.04                      |
| $\phi_8$  | 0.06                      |
| $\phi_9$  | 0.05                      |
| $F_m$     | 0.0065                    |

## 2 Derivations

### 2.1 Deriving a model in the large sample limit

Suppose the true large sample process obeys  $d\mathbf{X}^\infty/dt = \mathbf{F}(\mathbf{X}^\infty)$ . Then a Taylor expansion of  $\mathbf{X}^\infty$  about  $t$  gives (dropping the superscript  $\infty$ )

$$\mathbf{X}(t + \Delta) = \mathbf{X}(t) + \Delta\mathbf{F}(\mathbf{X}(t)) + \dots \quad (1)$$

so that when we account for measurement error  $\mathbf{Y} = \mathbf{X} + \mathbf{w}$  we have

$$\mathbf{Y}(t + \Delta) - \mathbf{w}(t + \Delta) = \mathbf{Y}(t) - \mathbf{w}(t) + \Delta\mathbf{F}(\mathbf{Y}(t) - \mathbf{w}(t)) + \dots \quad (2)$$

A Taylor expansion of  $\mathbf{F}$  about  $\mathbf{Y}(t)$  and a rearrangement gives

$$\frac{\mathbf{Y}(t + \Delta) - \mathbf{Y}(t)}{\Delta} - \mathbf{F}(\mathbf{Y}(t)) = \frac{\mathbf{w}(t + \Delta)}{\Delta} - \left[ \frac{\mathbf{I}}{\Delta} + (D\mathbf{F})(\mathbf{Y}(t)) \right] \mathbf{w}(t) + \dots \quad (3)$$

so that the variance  $\mathbb{V} \left( \frac{\mathbf{Y}(t+\Delta) - \mathbf{Y}(t)}{\Delta} - \mathbf{F}(\mathbf{Y}(t)) \right)$

$$= \frac{\mathbf{M}}{\Delta^2} + \left( \frac{\mathbf{I}}{\Delta} + D\mathbf{F} \right) \mathbf{M} \left( \frac{\mathbf{I}}{\Delta} + D\mathbf{F} \right)' + \dots \quad (4)$$

### 2.2 Deriving a model for longitudinal single cell measurements

An Euler-Maruyama approximation for single cell expression  $\mathbf{X}$  gives

$$\mathbf{X}(t + \Delta) = \mathbf{X}(t) + \Delta\mathbf{f}(\mathbf{X}(t)) + \mathbf{g}(\mathbf{X}(t))\Delta\mathbf{B} + \dots \quad (5)$$

so that when we account for measurement error  $\mathbf{Y} = \mathbf{X} + \mathbf{w}$  we have

$$\mathbf{Y}(t + \Delta) - \mathbf{w}(t + \Delta) = \mathbf{Y}(t) - \mathbf{w}(t) + \Delta\mathbf{f}(\mathbf{Y}(t) - \mathbf{w}(t)) + \mathbf{g}(\mathbf{Y}(t) - \mathbf{w}(t))\Delta\mathbf{B} + \dots \quad (6)$$

Taking a diffusion  $\mathbf{g}(\mathbf{X}) = \sigma\mathcal{D}(\mathbf{X})$ , a Taylor expansion of  $\mathbf{f}$  about  $\mathbf{Y}(t)$  and a rearrangement gives  $\frac{\mathbf{Y}(t+\Delta) - \mathbf{Y}(t)}{\Delta} - \mathbf{f}(\mathbf{Y}(t))$

$$= \frac{\mathbf{w}(t + \Delta)}{\Delta} - \left[ \frac{\mathbf{I}}{\Delta} + (D\mathbf{f})(\mathbf{Y}(t)) \right] \mathbf{w}(t) + \sigma[\mathcal{D}(\mathbf{Y}(t)) - \mathcal{D}(\mathbf{w}(t))]\Delta\mathbf{B} + \dots \quad (7)$$

so that  $\mathbb{V} \left( \frac{\mathbf{Y}(t+\Delta) - \mathbf{Y}(t)}{\Delta} - \mathbf{f}(\mathbf{Y}(t)) \right)$

$$= \frac{\mathbf{M}}{\Delta^2} + \left[ \frac{\mathbf{I}}{\Delta} + D\mathbf{f} \right] \mathbf{M} \left[ \frac{\mathbf{I}}{\Delta} + D\mathbf{f} \right]' + \frac{\mathbf{g}\mathbf{g}'}{\Delta} + \dots \quad (8)$$

Notice that this variance is larger than the corresponding variance in Eqn. 4, showing that a single cell data set contains less information than the corresponding dataset for an averaged process.

### 2.3 Approximating $h_{\text{true}}$ for Cantone

From Eqn. 4 a natural choice of variance function  $h_{\text{true}}$  is

$$h_{\text{true}}(\Delta)\mathcal{D}(\sigma_1^2, \dots, \sigma_P^2) \approx \mathbf{M}\Delta^{-2} + (\mathbf{I}\Delta^{-1} + D\mathbf{F})\mathbf{M}(\mathbf{I}\Delta^{-1} + D\mathbf{F})' \quad (9)$$

where the large sample process obeys  $d\mathbf{X}^\infty/dt = \mathbf{F}$ . This can be made precise under a given matrix norm:

$$h_{\text{true}}(\Delta) \approx \frac{\|\mathbf{M}\Delta^{-2} + (\mathbf{I}\Delta^{-1} + D\mathbf{F})\mathbf{M}(\mathbf{I}\Delta^{-1} + D\mathbf{F})'\|}{\|\mathcal{D}(\sigma_1^2, \dots, \sigma_P^2)\|} \quad (10)$$

Under the (strong) assumption that  $\mathbf{F} \equiv \mathbf{F}(\mathbf{X}^\infty)$  we have that  $D\mathbf{F}|_{\mathbf{x}^\infty=\mathbf{0}} = D\mathbf{f}|_{\mathbf{x}^k=\mathbf{0}}$  since  $\mathbf{X}^\infty = \mathbf{0}$  if and only if almost all the  $\mathbf{X}^k = \mathbf{0}$ . So it suffices to find the Jacobian of the single cell drift  $\mathbf{f}$ .

We seek an approximation to  $h_{\text{true}}$  for Cantone *et al*, so for simplicity ignore the delay term in the regulation of Cbfl by Swi5. Then

$$D\mathbf{f}|_{\mathbf{x}=\mathbf{0}} = \begin{bmatrix} -d_1 & 0 & v_1/k_1 & 0 & 0 \\ v_2/k_3 & -d_2 & 0 & 0 & 0 \\ 0 & 0 & -d_3 & 0 & 0 \\ 0 & 0 & v_k/k_5 & -d_4 & 0 \\ 0 & 0 & v_5/k_6 & 0 & -d_5 \end{bmatrix}. \quad (11)$$

Substituting Eqn. 11 for  $D\mathbf{F}$  in Eqn. 10 provides an approximation to  $h_{\text{true}}$ .

### 3 Additional Figures

In this section we simply reproduce AUR scores. However the MATLAB R2010a code included in this supplement will automatically display typical datasets, ROC and PR curves in addition to these AUR scores. (For an introduction to receiver operating characteristic (ROC) and precision-recall (PR) analysis, the reader is referred to [Davis, J., Goadrich, M. (2006) The relationship between Precision-Recall and ROC curves, *ICML '06 Proceedings of the 23rd international conference on Machine learning*].)

In order to reproduce these experiments, simply run the .m-file Experiment\_k where k = 1,2,3,4,5.

These plots employ the same key as the main text.

#### 3.1 Experiment 1

$N = 10,000$  ( $N^* = 30$ ) simulated microarray experiment.  $n = 20$  data points are obtained at regular intervals from independent realizations of the process, mimicking destructive sampling. Additive Gaussian measurement error is applied. The procedure is repeated 20 times over to obtain a distribution of AUR scores for each inference scheme.

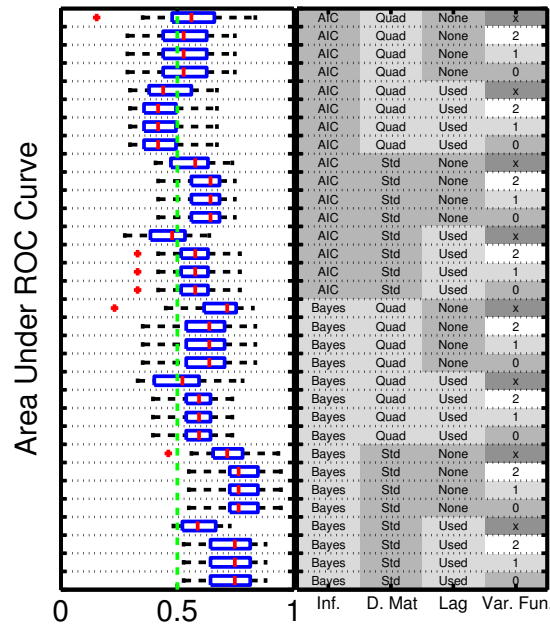

SFig. 1: AUR for Cantone *et al*, even sampling times.

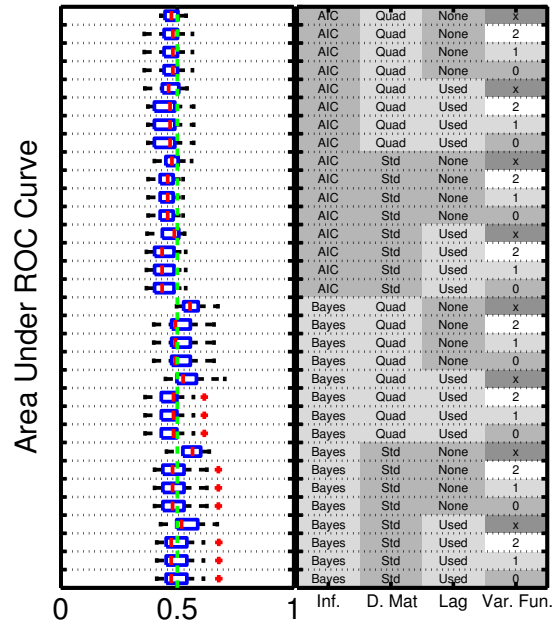

SFig. 2: AUR for Swat *et al.*, even sampling times.



Inference was repeated using more nonlinear basis functions (SFig. 3) and longer delay times (SFig. 4).

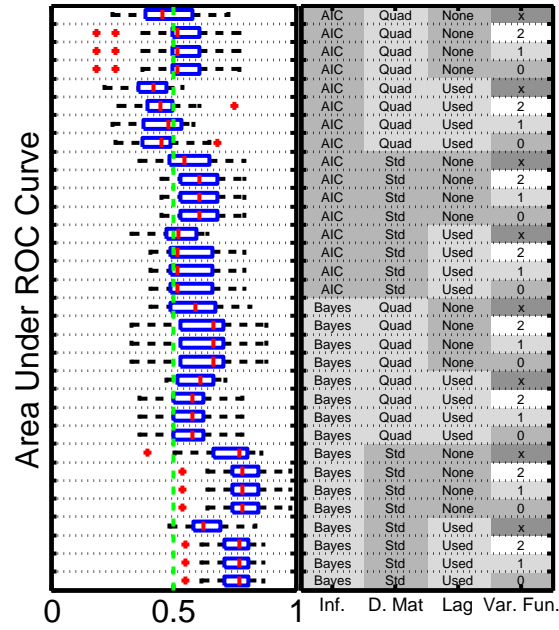

SFig. 3: AUR for Cantone *et al*, even sampling times, with cubic predictors.

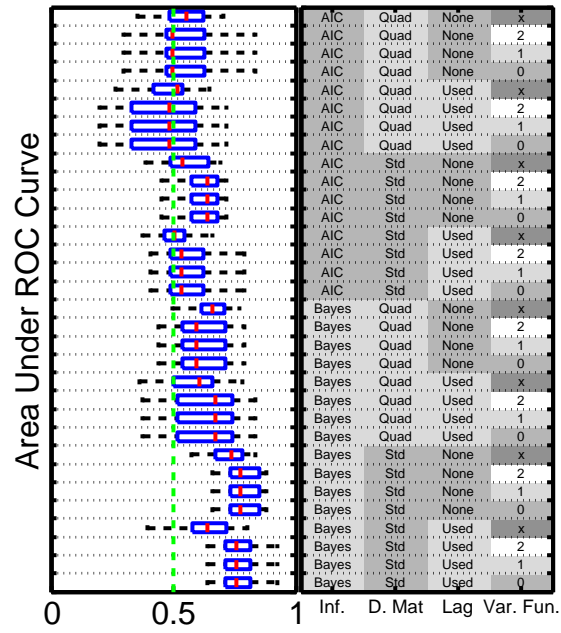

SFig. 4: AUR for Cantone *et al*, even sampling times, with a delay of double duration.

Inference was also performed on the *in vivo* averaged “switch-on” dataset published by Cantone *et al.* Results in SFig. 5 demonstrate reasonable agreement with the *in silico* experiment SFig. 1.

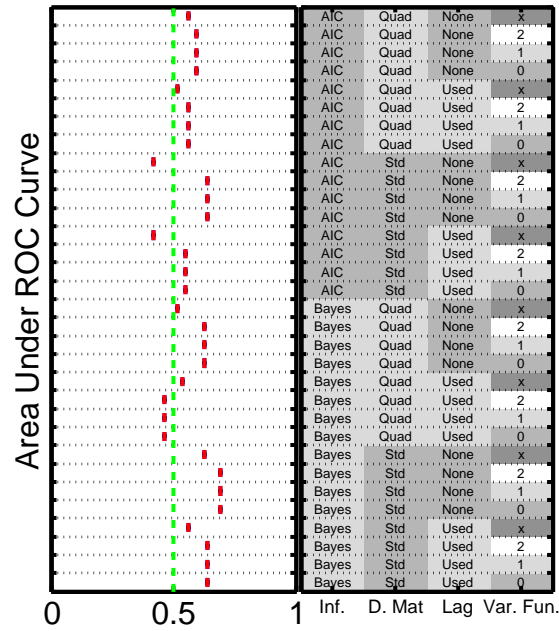

SFig. 5: AUR for Cantone *et al.*, even sampling times, based on *in vivo* data.

Robustness to  $d_{\max}$  was verified by repeating the analyses using  $d_{\max} = 3$ . One such example is presented in SFig. 6.

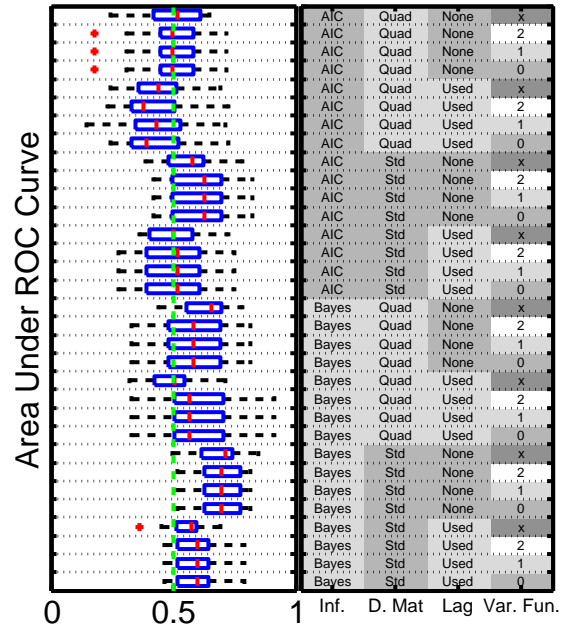

SFig. 6: AUR for Cantone *et al*, even sampling times, using  $d_{\max} = 3$ .

### 3.2 Experiment 2

The conditions of Experiment 1 are maintained, with the exception that data are obtained at irregular intervals. For Cantone *et al* these measurements occur at [0, 1, 5, 10, 15, 20, 30, 40, 50, 60, 75, 90, 105, 120, 140, 160, 280, 210, 240, 280] minutes and for Swat *et al* (for consistency) we also use these intervals, normalised to lie in [0,100] minutes.

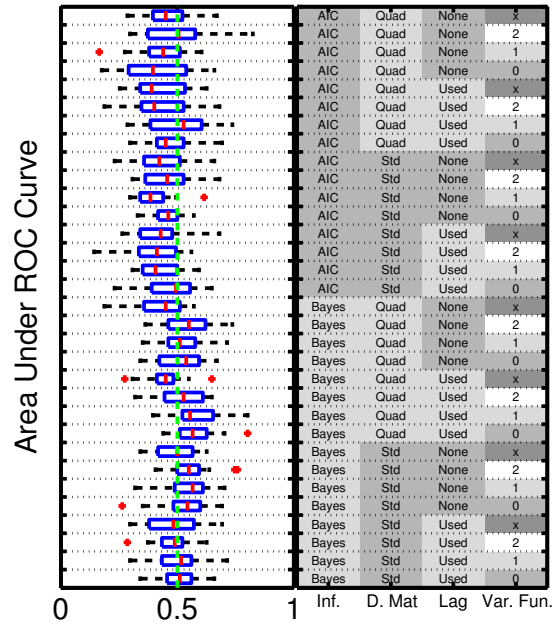

SFig. 7: AUR for Cantone *et al*, uneven sampling times.

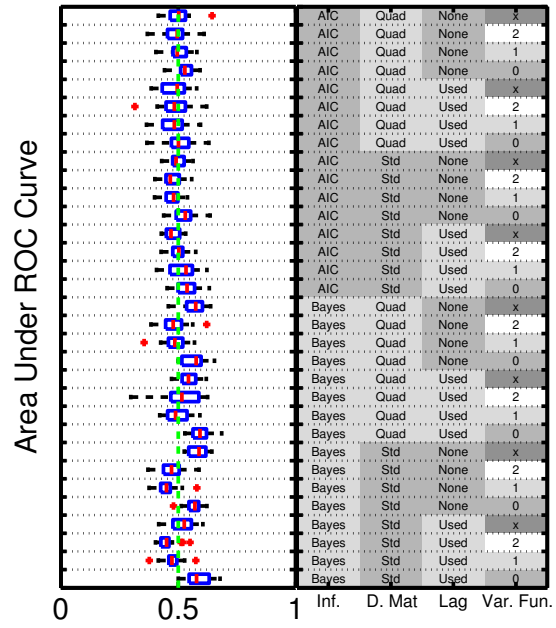

SFig. 8: AUR for Swat *et al*, uneven sampling times.

### 3.3 Experiment 3

For this experiment we obtain simulated microarray data in the limits of zero measurement noise ( $\sigma_{\text{meas}} = 0$ ), zero cellular heterogeneity ( $\sigma_{\text{cell}} = 0$ ) and large samples ( $N \rightarrow \infty$ ). Otherwise we follow Experiments 1 and 2, using both even and uneven sampling times. Since the data are deterministic, the corresponding AUR scores nonrandom.

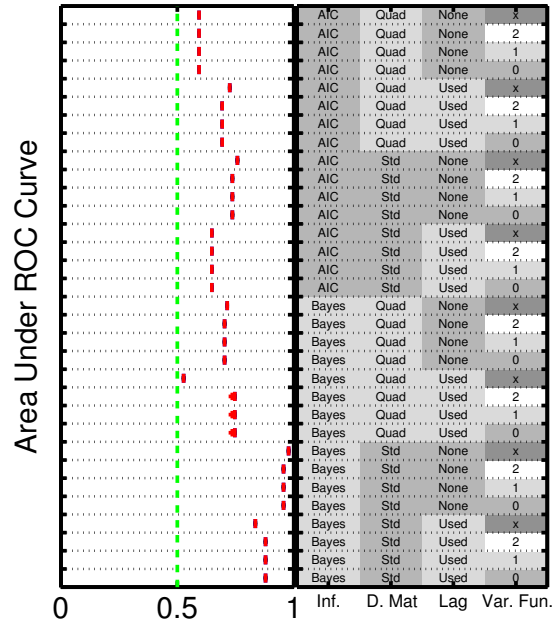

SFig. 9: AUR for Cantone *et al*, even sampling times.

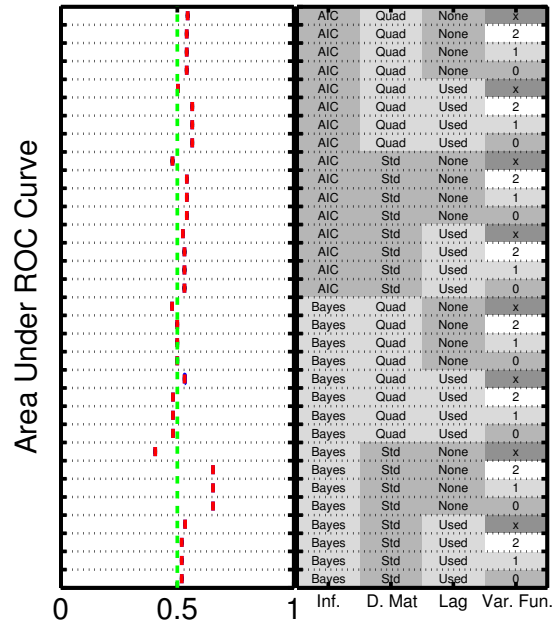

SFig. 10: AUR for Swat *et al*, even sampling times.

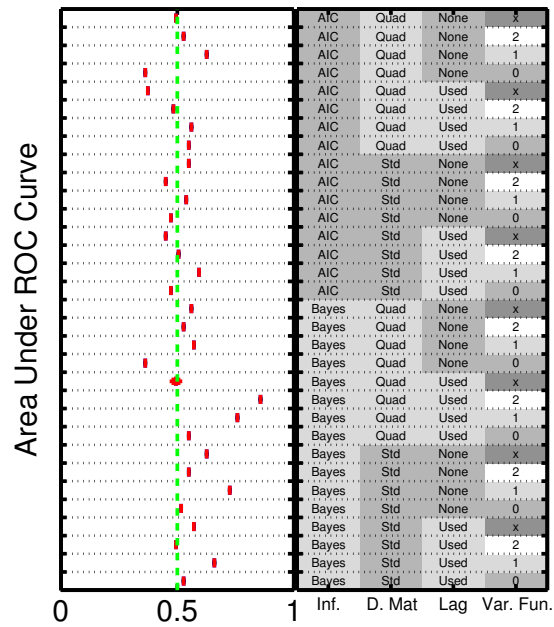

SFig. 11: AUR for Cantone *et al*, uneven sampling times.



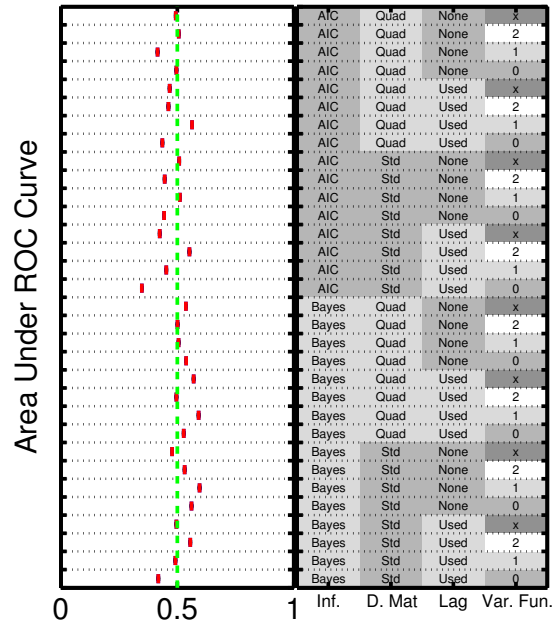

SFig. 12: AUR for Swat *et al*, uneven sampling times.

### 3.4 Experiment 4

This Experiment investigates the benefit of longitudinal single cell data. Under regular sampling,  $C = 10$  single cell trajectories are recorded with additive Gaussian measurement error. The design matrices and predictors are concatenated to produce a total of  $n \times C$  time points for inference.

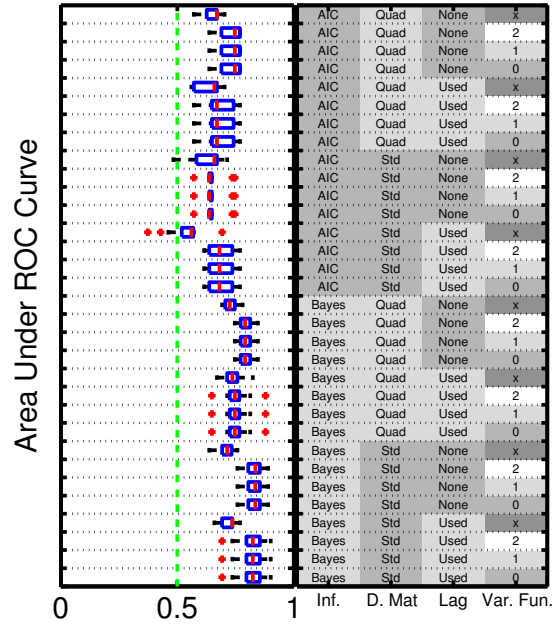

SFig. 13: AUR for Cantone *et al*, even sampling times.

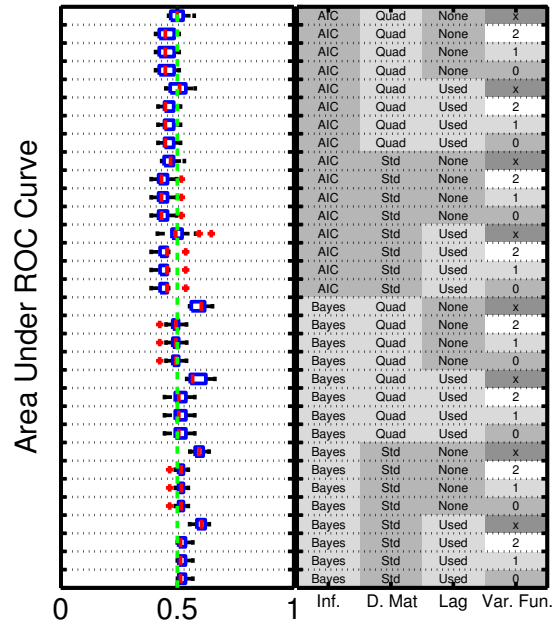

SFig. 14: AUR for Swat *et al*, even sampling times.

### 3.5 Experiment 5

This Experiment investigates the benefit of inhibition data. ( $N = 10,000$ ,  $N^* = 30$ .) Under regular sampling, averaged trajectories of the process with variable  $k$  inhibited are recorded with additive Gaussian measurement error. The design matrices and predictors are concatenated to produce a total of  $n \times P$  time points for inference.

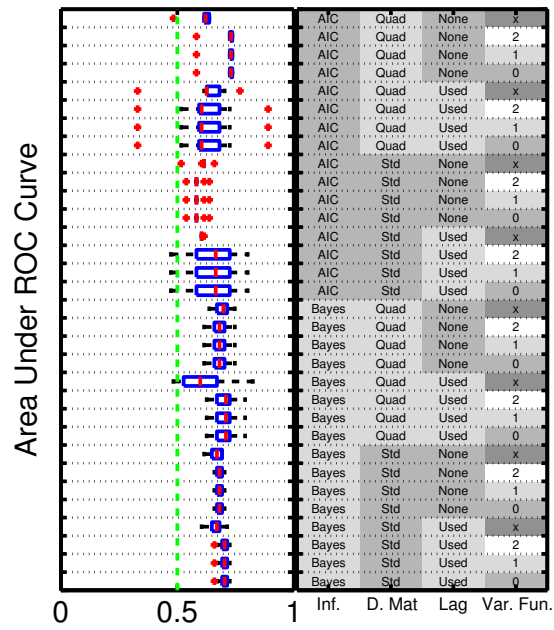

SFig. 15: AUR for Cantone *et al*, even sampling times.

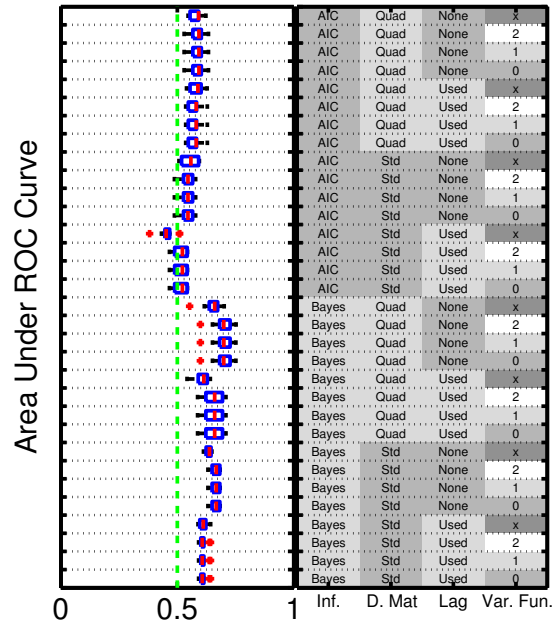

SFig. 16: AUR for Swat *et al*, even sampling times.
